# Supplementary material
Source: Elsevier journal article supplement (https://www.sciencedirect.com/science/article/pii/S0034935620302012)
Supplement: mmc3 [file S0034935620302012:mmc3.pdf]

## ***Pantalla de protección facial con cubierta superior PV19V2.0***

### **JUSTIFICACIÓN**

Ante la situación de alarma sanitaria generada por la pandemia por coronavirus, una de las medidas más importantes es la protección integral de cada profesional sanitario, puesto que son las personas que tienen un mayor riesgo de contagio. Las medidas de prevención contra la expansión se convierten en armas fundamentales para reducir las transmisiones y en esta línea los EPI'S (Equipos de Protección Individual) son esenciales para el personal que combate la enfermedad. La capacidad de abastecimiento de estos EPI'S, debido a la gran demanda en un corto plazo de tiempo, se convierte en un problema para el país. La capacidad de producción de máscaras de protección faciales se ve diezmada ante la masiva petición de este material.

Como iniciativa para paliar esta escasez de equipos de protección, diferentes iniciativas de empresas y particulares están aportando una gran capacidad de fabricación aditiva (impresión 3D) para cubrir esta enorme demanda de pantallas de protección. Se busca una alternativa para la producción industrial y que reúna los máximos requisitos de seguridad y aislamiento.

### **DISEÑO**

Es importante la ergonomía que permita trabajar al profesional con ella el mayor número de horas continuadas y permita una ventilación continua. Estas pantallas deben aportar el máximo recubrimiento facial, una alta tasa de transparencia y un bajo peso.

### **PROCESO DE FABRICACIÓN**

Se ha diseñado, prototipado, fabricado y testado un tipo de máscara de protección facial anti-salpicaduras de policarbonato cuya fabricación inicial se realiza a través de corte por láser.

Es importante destacar que el diseño de este modelo se basa en un modelo existente en código abierto (<https://github.com/UIC-Makerspace/FaceShield>) al cual se le han realizado ciertas modificaciones según necesidades particulares de nuestros profesionales sanitarios.

### **CONSORCIO**

Este modelo de pantalla de protección ha sido una colaboración entre las empresas E.N.S.A, Metacrilato y grabados de Cantabria, Textil Santanderina y el Hospital virtual Valdecilla.

- E.N.S.A – Investigación del estado del arte, búsqueda del material técnico necesario, modificaciones del diseño y financiación de material para el primer lote.
- Metacrilato y grabados – Desarrollo y fabricación de la pantalla.
- Textil Santanderina – Donación de uno de los componentes de la pantalla (cinta elástica de apriete).
- Hospital virtual Valdecilla – Investigación de necesidades del entorno sanitario y diseños en códigoabierto, ensamblado y testado en entorno sanitario por profesionales sanitarios.

### **COMPONENTES DE LA PANTALLA PV19V2.0:**

1. Pantalla de policarbonato de 0.375mm
2. Diadema frontal de polipropileno de 0.8mm
3. Cinta elástica de apriete de 25mm.

Este conjunto tiene un peso de 60 gramos.

Adjunto se muestran los planos del diseño con el objetivo de que la comunidad pueda hacer uso de los mismos.

### **ENSAMBLAJE**

Video adjunto.

### **REFERENCIAS**

<https://hackaday.io/project/170481-laser-cut-medical-shield> <https://github.com/UIC-Makerspace/FaceShield>
