# Supplementary material
Source: Elsevier journal article supplement (https://www.sciencedirect.com/science/article/pii/S0034935620302012)
Supplement: mmc5 [file S0034935620302012:mmc5.pdf]

## **Accesorio para fotóforos**

### **JUSTIFICACIÓN**

Ante la pandemia de COVID-19, los profesionales sanitarios han tenido que modificar sus hábitos de trabajo. Los Servicios de Otorrinolaringología y Oftalmología de Urgencia del Hospital Universitario Marqués de Valdecilla observaron la necesidad de protegerse en su trabajo diario con los pacientes por las características del mismo. Trabajan a gran proximidad de la vía aérea del paciente y para tomar las medidas necesarias de protección y reducir el riesgo ante posibles contagiados no eran efectivas las pantallas faciales que usan otros profesionales sanitarios.

En ese momento, desde el HvV se comenzó a trabajar en unos soportes que se integrasen en sus cascos con fotóforos que permitiesen colocar una plancha de policarbonato que evitase el contagio. Estos soportes, denominados aquí como 'accesorio para fotóforos', han elevado la seguridad en el trabajo de estos profesionales sanitarios y permite que puedan seguir con su labor sin repercutir el COVID-19 en la asistencia a pacientes de los Servicios de Otorrinolaringología y Oftalmología de Urgencia del HUMV.

### **DISEÑO**

El desafío era incorporar al fotóforo unos soportes que pudiesen sujetar una pantalla de policarbonato que cubriese el rostro de los sanitarios. Los soportes deben acoplarse de manera segura y sin interferir en su visión a un elemento complejo como es el fotóforo. Las pantallas, por su parte, deben aportar el máximo recubrimiento facial y una alta tasa de transparencia.

### **PROCESO DE FABRICACIÓN**

Se ha diseñado, prototipado, fabricado y testeado un accesorio para fotóforos. Después de hablar con profesionales de los Servicios mencionados y trabajar con ellos para desarrollar un diseño que satisficiera sus necesidades, el HvV ha creado un diseño original que se ha testado en el HUMV. Tras considerar exitosa la prueba se han producido los accesorios para fotóforos que se han solicitado.

El proceso de producción se ha llevado a cabo con las impresoras 3D de FDM y SLA según la programación de la producción del día. El material utilizado ha sido el filamento PLA de 2,85 mm de diámetro y resina de fotopolímero "White". En las camas de estos modelos de impresoras se pueden producir hasta diez soportes en una misma impresión. No hace falta retirar soportes una vez se ha impreso.

### **CONSORCIO**

Este modelo de pantalla de protección ha sido una colaboración entre el Hospital virtual Valdecilla, los Servicios de Otorrinolaringología y de Oftalmología de Urgencia del Hospital Universitario Marqués de Valdecilla y la Universidad de Cantabria.

### **COMPONENTES DEL ACCESORIO PARA FOTÓFOROS**

1. Accesorio de fotóforo impreso en 3D.
2. Velcro. Para la sujeción del soporte con el fotóforo.
3. Pantalla de policarbonato de 300 micras.

### **ENSAMBLAJE**

Los accesorios de fotóforo se fijan con velcro al casco fotóforo. Para un casco fotóforo estimamos que son idóneos cuatro accesorios. Una vez fijados se agujerea la pantalla de policarbonato teniendo en cuenta dónde van a ser necesarios los agujeros para encajarlos en los soportes. Estas medidas varían en función de cada fotóforo y de dónde coloquemos los accesorios. Una vez colocada la pantalla de policarbonato, hay que cambiarla cuando se considere preciso.
