# Supplementary material
Source: Elsevier journal article supplement (https://www.sciencedirect.com/science/article/pii/S0034935620302012)
Supplement: mmc8 [file S0034935620302012:mmc8.pdf]

## ***Hisopo HISVAL toma muestras para PCR***

### **JUSTIFICACIÓN**

Ante la situación de alarma sanitaria generada por la pandemia por coronavirus, una de las medidas más importantes es la identificación de las personas que son portadoras del coronavirus con el objetivo de diseñar estrategias de tratamiento con el mayor número de datos reales posibles.

Para la identificación de las personas portadoras del coronavirus, se utilizan unos test denominados PCR que permite identificar componentes genéticos del patógeno. Estas pruebas rápidas, requieren que se extraiga una muestra de componentes a través de vía nasofaríngea mediante un hisopo.

Debido a una dimensión global de emergencia sanitaria, se ha producido una rotura de stock de estos hisopos tan necesarios. Con el objetivo de cubrir esta rotura de stock, se ha diseñado, prototipado, testado y fabricado un hisopo. Para ello se ha generado un equipo interprofesional con microbiólogos, otorrinolaringólogos, enfermeras, médicos de atención primaria e ingenieros.

### **DISEÑO**

Es importante la ergonomía que permita al profesional sanitario que toma la muestra poder introducir el hisopo de manera sencilla y que le aporte una sensación de seguridad durante el proceso.

Además, hay que tener en cuenta que la cabeza del hisopo evite posibles pinchazos a lo largo de la cavidad nasofaríngea y que su estructura sea de tal manera que se reduzca la posibilidad de rotura dentro de la cavidad durante la recogida de muestras permitiendo a su vez una capacidad del mismo de flexar para facilitar su introducción.

El diseño de este hisopo se ha adaptado a las necesidades de los profesionales sanitarios.

Adjunto se muestran los planos del diseño con el objetivo de que la comunidad pueda hacer uso de los mismos.

### **PROCESO DE FABRICACIÓN**

Se ha diseñado, prototipado, fabricado y testado un modelo de hisopo para la recogida de muestras cuya fabricación se realiza a través de tecnología aditiva SLA con material biocompatible. La fabricación se realiza con una altura de capa de 100 micras.

### **MATERIAL DE FABRICACIÓN**

Al tratarse de un componente que puede estar en contacto con mucosa, es necesario la utilización de un material biocompatible. En este caso hemos utilizado una resina de fotopolímero biocompatible con certificación CE que cumple con los requisitos de Clase I.

### **CUESTIONES DE SEGURIDAD**

Después de la fabricación es necesario realizar un proceso de desinfección para cumplir con los requerimientos de biocompatibilidad. Para ello se realiza un post-curado en una cámara de rayos ultravioleta durante 60 minutos a 60°C de la resina, una desinfección con alcohol isopropílico y una esterilización en autoclave.
